# Supplementary material for: Highly efficient CuNi–ZrO2 nanocomposites for selective hydrogenation of levulinic acid to γ-valerolactone
Source: Royal Society of Chemistry journal article supplement (doi:10.1039/d4ra04960h), 2024-01-01
Supplement: d4ra04960h1.pdf [file d4ra04960h1.pdf]

## Highly efficient CuNi-ZrO<sub>2</sub> nanaocomposite for selective hydrogenation of levulinic acid to $\gamma$ -valerolactone

Yufang Ding<sup>‡</sup>, Junli Sun<sup>‡</sup>, Rongqi Hu, Daiping He\*, Xulin Qiu, Chengying Luo, Ping Jiang

Chongqing Key Lab of Green Catalysis Materials and Technology, College of Chemistry, Chongqing Normal University, Chongqing 401331, China E-mail: hedaiping@126.com

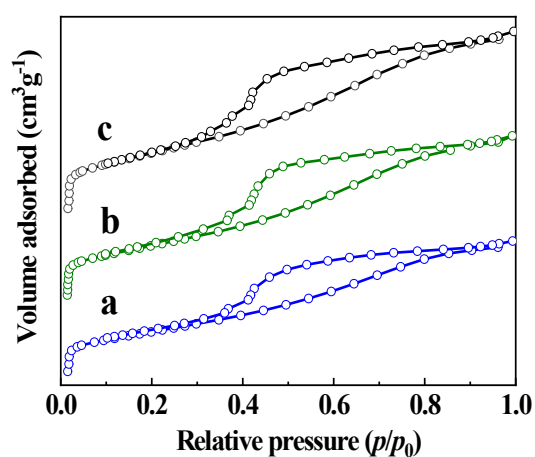

**Figure S1.** Adsorption-desorption isotherms of Cu<sub>0.5</sub>-ZrO<sub>2</sub> (a), Ni<sub>0.5</sub>-ZrO<sub>2</sub> (b) and Cu<sub>0.05</sub>Ni<sub>0.45</sub>-ZrO<sub>2</sub> (c) catalysts.

**Table S1.** Textural properties of the Cu<sub>0.5</sub>-ZrO<sub>2</sub>, Ni<sub>0.5</sub>-ZrO<sub>2</sub> and Cu<sub>0.05</sub>Ni<sub>0.45</sub>-ZrO<sub>2</sub> catalysts.

| Catalyst                                                | Specific surface area<br>(m <sup>2</sup> g <sup>-1</sup> ) | Pore volume<br>(cm <sup>3</sup> g <sup>-1</sup> ) | Average pore size<br>(nm) |
|---------------------------------------------------------|------------------------------------------------------------|---------------------------------------------------|---------------------------|
| Cu <sub>0.5</sub> /ZrO <sub>2</sub>                     | 85                                                         | 0.13                                              | 3.6                       |
| Ni <sub>0.5</sub> /ZrO <sub>2</sub>                     | 94                                                         | 0.16                                              | 3.5                       |
| Cu <sub>0.05</sub> Ni <sub>0.45</sub> /ZrO <sub>2</sub> | 101                                                        | 0.18                                              | 3.7                       |

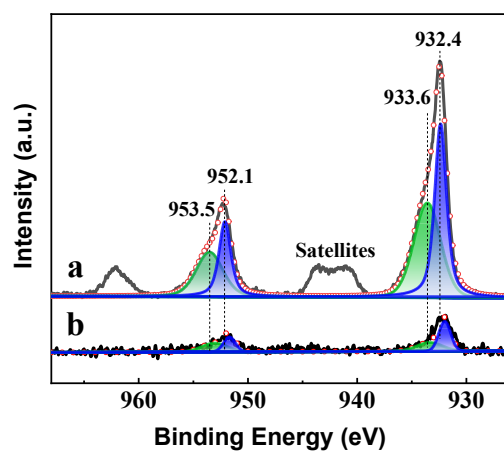

Figure S2. XPS spectra of Cu<sub>2p</sub> for the Cu<sub>0.5</sub>/ZrO<sub>2</sub> (a) and Cu<sub>0.05</sub>-Ni<sub>0.45</sub>/ZrO<sub>2</sub> (b) catalysts.

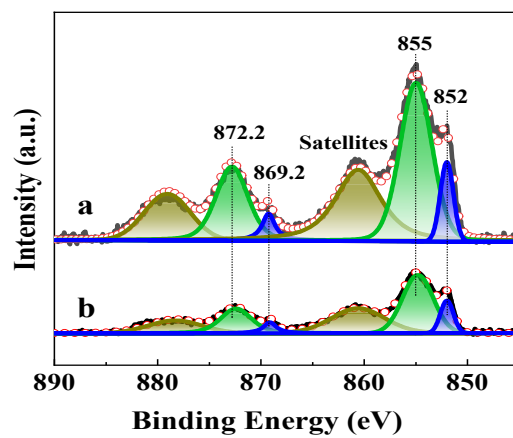

Figure S3. XPS spectra of Ni<sub>2p</sub> for the Cu<sub>0.5</sub>/ZrO<sub>2</sub> (a) and Cu<sub>0.05</sub>-Ni<sub>0.45</sub>/ZrO<sub>2</sub> (b) catalysts.

**Table S2.** Catalytic performance for the hydrogenation of LA to GVL on different catalysts.

| Entry | Catalyst                             | T/°C | P <sub>H<sub>2</sub></sub> /Mpa | t/h | LA Conv. | GVL Sel. | Ref.      |
|-------|--------------------------------------|------|---------------------------------|-----|----------|----------|-----------|
| 1     | Ni/SiO <sub>2</sub>                  | 250  | 1                               | 1   | 99.9     | 87       | 1         |
| 2     | Ni/TiO <sub>2</sub>                  | 270  | 1                               | 3   | 99.9     | 99.1     | 2         |
| 3     | Cu/ZrO <sub>2</sub>                  | 200  | 3.5                             | 5   | 100      | 100      | 3         |
| 4     | Cu/Al <sub>2</sub> O <sub>3</sub>    | 200  | 3.5                             | 5   | 100      | 100      | 3         |
| 5     | Cu-Ni/SiO <sub>2</sub>               | 250  | 1                               | 8   | 99.1     | 99.2     | 4         |
| 6     | Ni-Cu/Al <sub>2</sub> O <sub>3</sub> | 220  | 3                               | 6   | 100      | >99      | 5         |
| 7     | CuAgZrO <sub>2</sub>                 | 200  | 3                               | 4   | 100      | >99      | 6         |
| 8     | Ni-Cu/ZrO <sub>2</sub>               | 200  | 3                               | 1.5 | >99.9    | >99.9    | This work |

### References

- 1 V. Mohan, V. Venkateshwarlu, C.V. Pramod, B.D. Raju and K.S. Rao, *Catal. Sci. Technol.*, 2014, **4**, 1253.
- 2 V. V. Kumar, G. Naresh, M. Sudhakar, J. Tardio, S.K. Bhargava and A. Venugopal, *Appl. Catal. A: Gen.*, 2015, **505**, 217.
- 3 A. M. Hengne and C. V. Rode, *Green Chem.*, 2012, **14**, 1064.
- 4 R. Yoshida, D. Sun, Y. Yamada, S. Sato and G. J. Hutchings, *Catal. Commun.*, 2017, **97**, 79.
- 5 M. N. Gebresillase, R. Q. Raguindin, H. Kim and J. G. Seo, *Catalysts.*, 2020, **10**, 1354.
- 6 Y. F. Jia, H. Lv, J. B. Mao and J. X. Zhou, *New J. Chem.*, 2024, **48**, 7810.
